# Supplementary figures and images for: Predictive Value of the Transthoracic Echocardiography Index for Acute Kidney Injury after Cardiac Valve Surgery
Source: MDPI journal article supplement (doi:10.3390/jcdd9100316), 2022-09-21

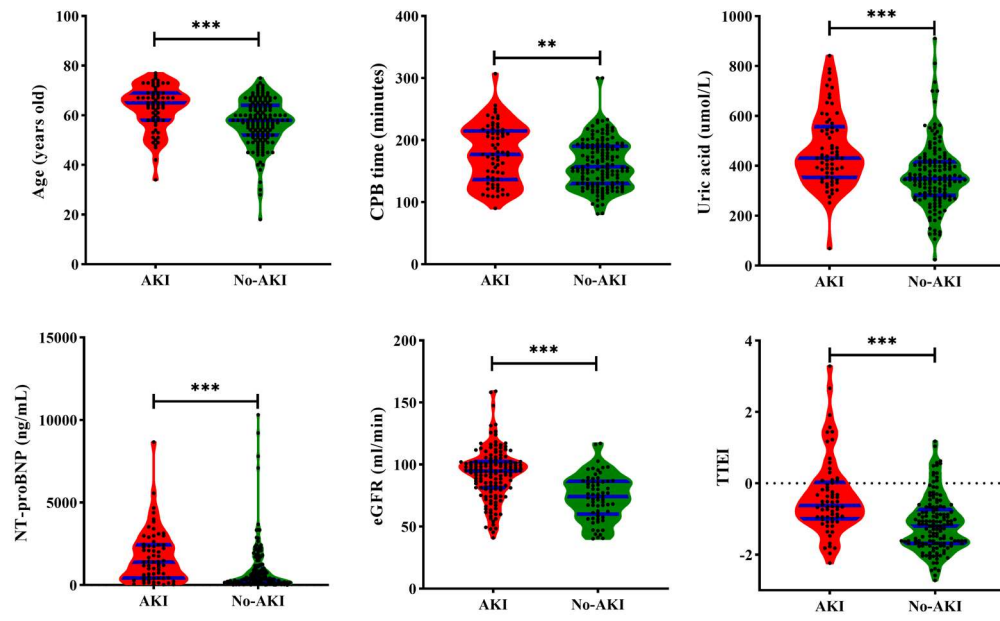

**Figure S1.** The distribution of selected factors by LASSO regression in AKI and No-AKI group.

Supplement: s1 [file s1]
